# Supplementary material for: In Situ Deposition of Gold Nanoparticles and L-Cysteine on Screen-Printed Carbon Electrode for Rapid Electrochemical Determination of As(III) in Water and Tea
Source: Biosensors (Basel). 2023 Jan 12;13(1):130. doi: 10.3390/bios13010130 (PMC9856477; doi:10.3390/bios13010130)
Supplement: Supplementary file 1 [file biosensors-13-00130-s001.zip › biosensors-2137478-supplementary.pdf]

## Supplementary Materials

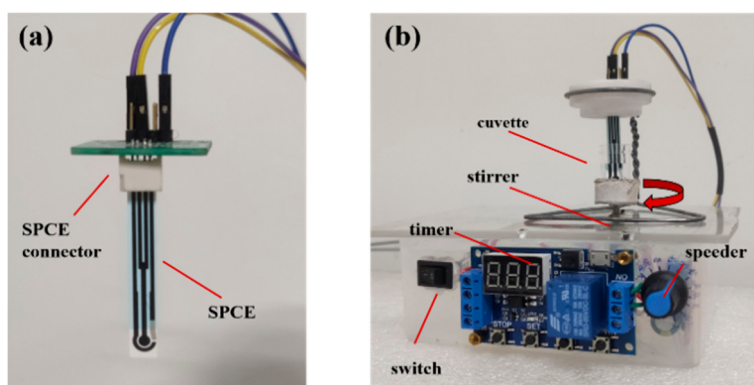

**Figure S1.** Illustration of the self-made stirring device. (a) a screen-printed electrode and a matched connector. (b) a home made stirring device.

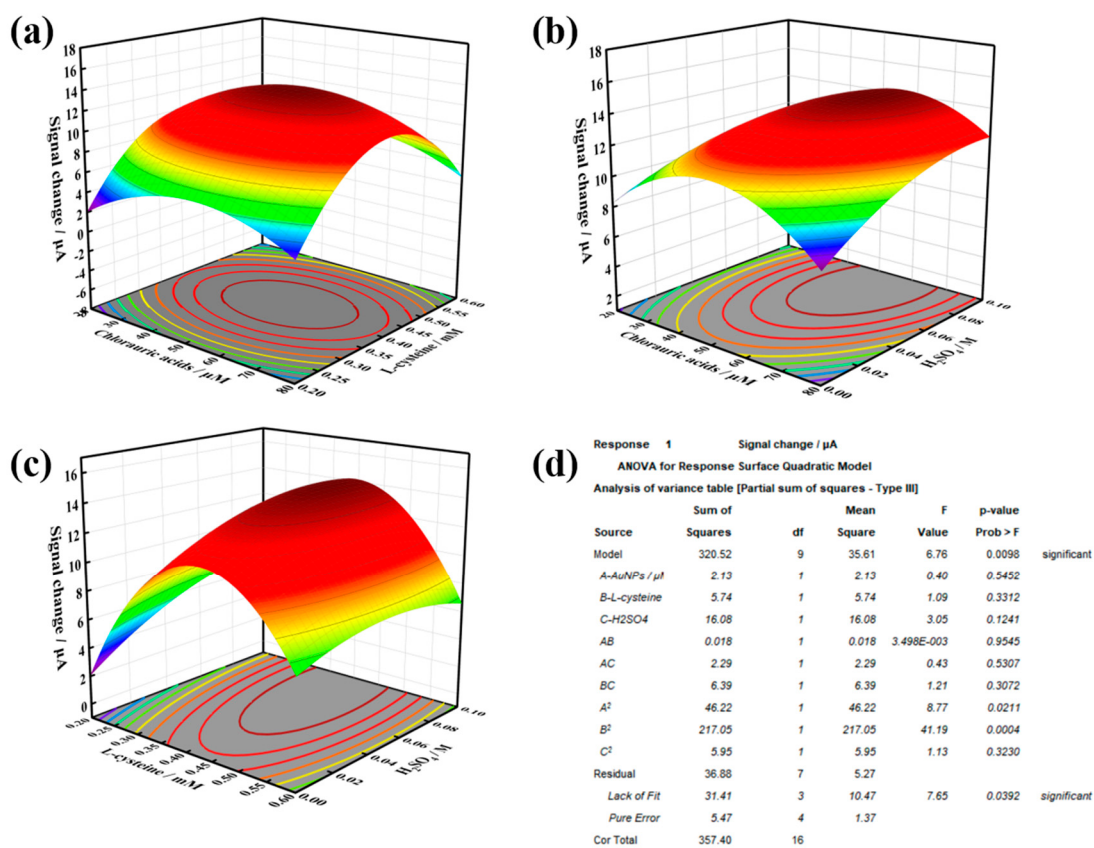

**Figure S2.** Influence of the concentration ratio of the components in the mixed stock solution on the stripping of As(III). (a) chloroauric acids and L-cysteine (b) chloroauric acids and H<sub>2</sub>SO<sub>4</sub> (c) L-cysteine and H<sub>2</sub>SO<sub>4</sub> (d) ANOVA for Response Surface Quadratic Model.

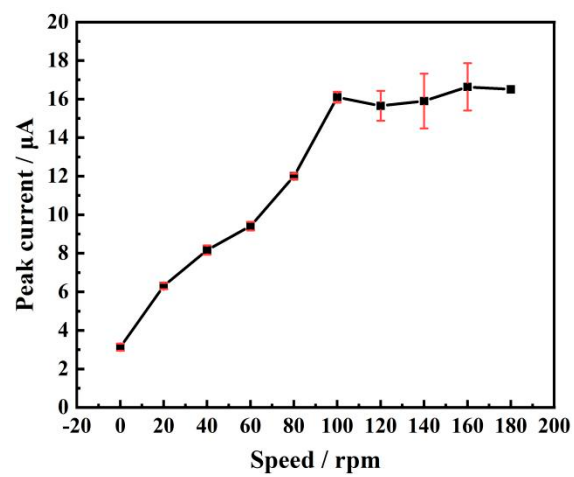

**Figure S3.** Effect of stirring speed on the peak current values of arsenic solution.
